# Supplementary material
Source: PubMed Central journal article supplement (PMC5511705)
Supplement: NIHMS874755-supplement-supplement_1.pdf [file NIHMS874755-supplement-supplement_1.pdf]

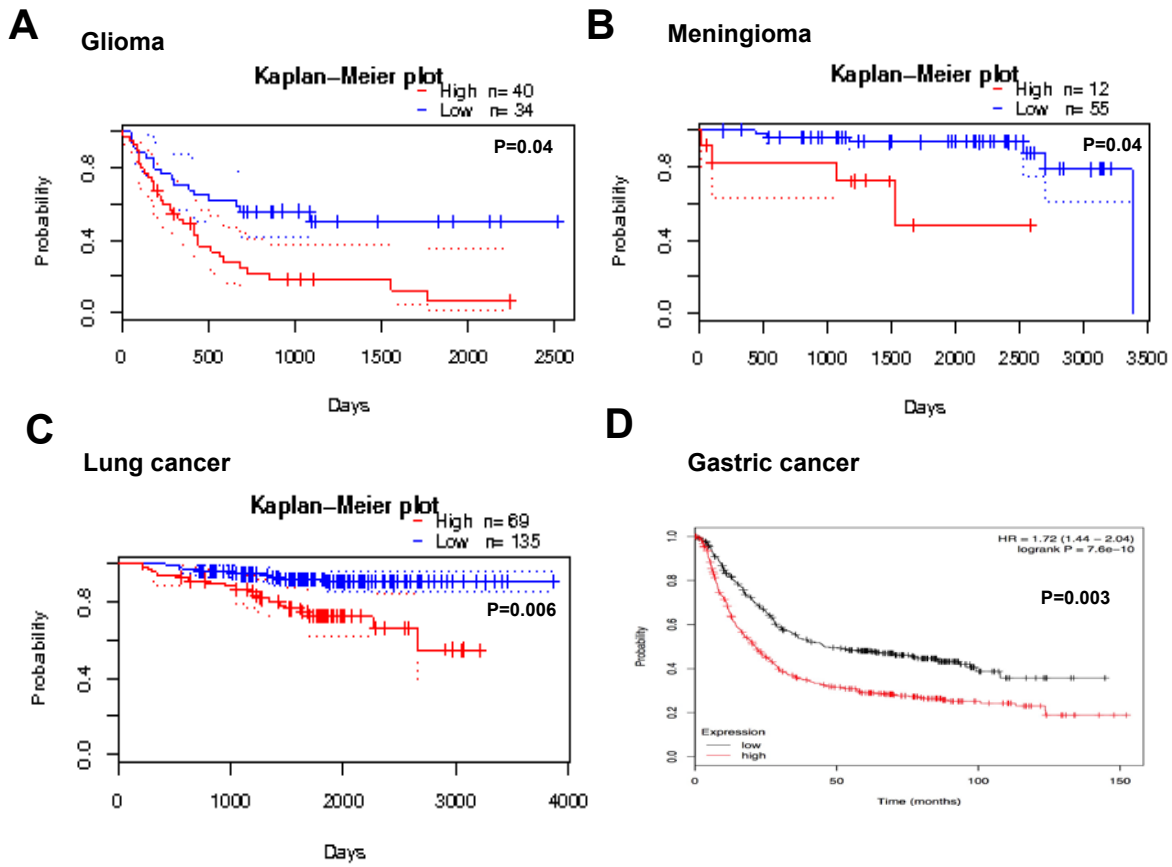

**Fig. S1 Higher expression of EglN2 is correlated with poor clinical outcomes in human tumors.**

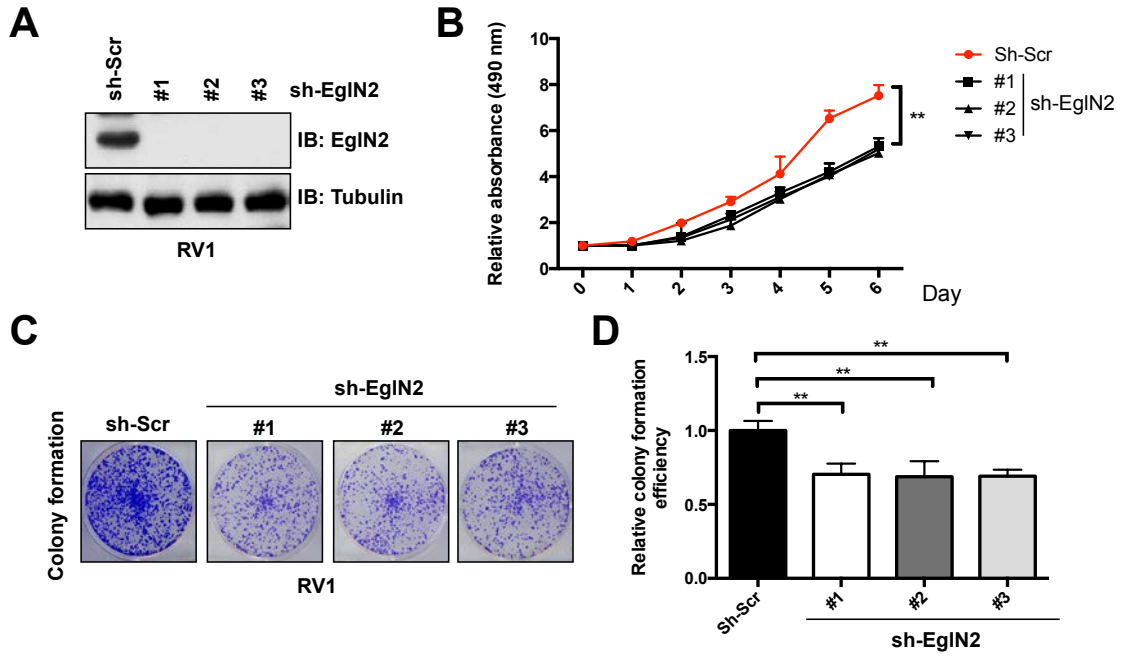

**Fig. S2 deletion of EglN2 attenuates prostate cancer cell growth**

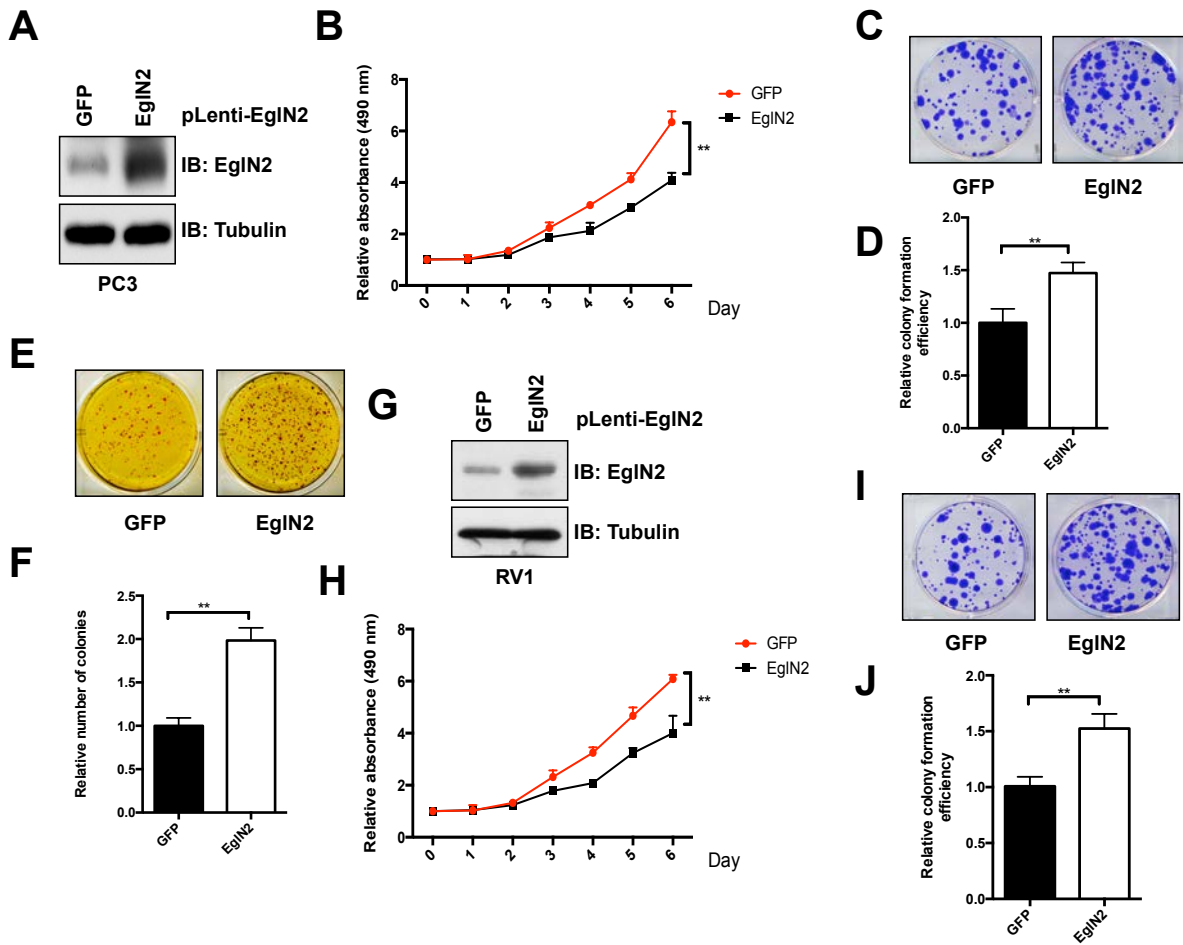

**Fig. S3 Ectopic expression of Egin2 enhances prostate cancer cell oncogenic functions**

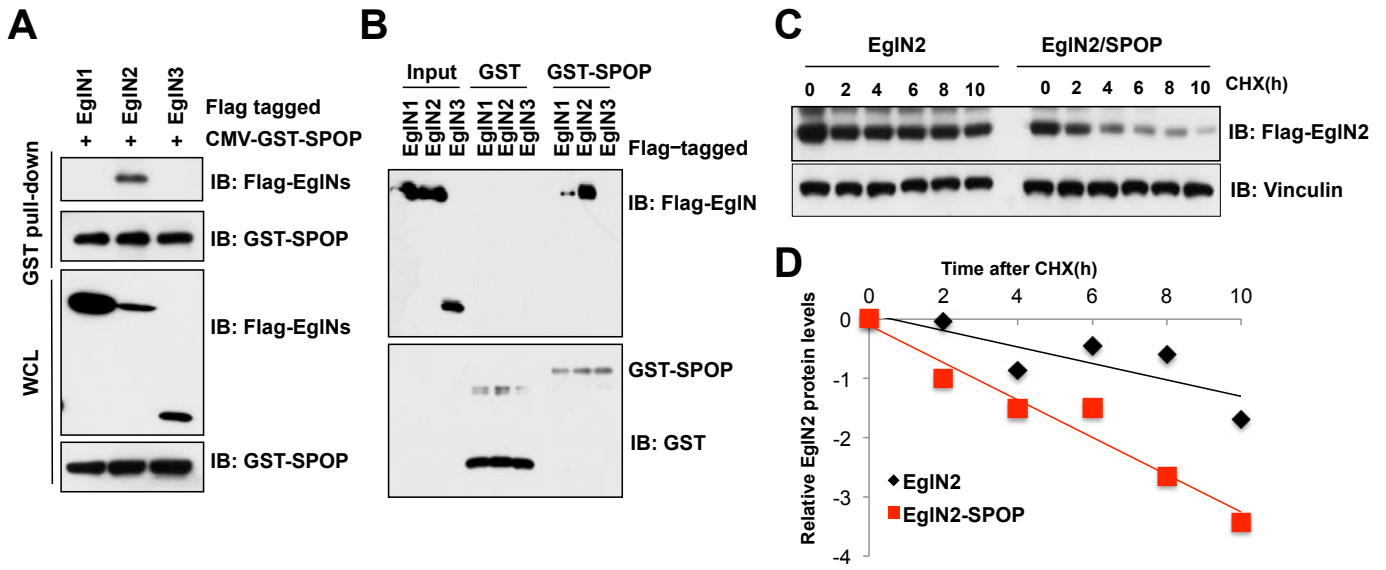

**Fig. S4 SPOP specifically interacts with Egin2, but not Egin1 or Egin3**
